# Supplementary material for: Discriminative feature of cells characterizes cell populations of interest by a small subset of genes
Source: PubMed Central journal article supplement (PMC8641884; doi:10.1371/journal.pcbi.1009579), 2021-11-19

# Figure S1\_Fujii

**a**

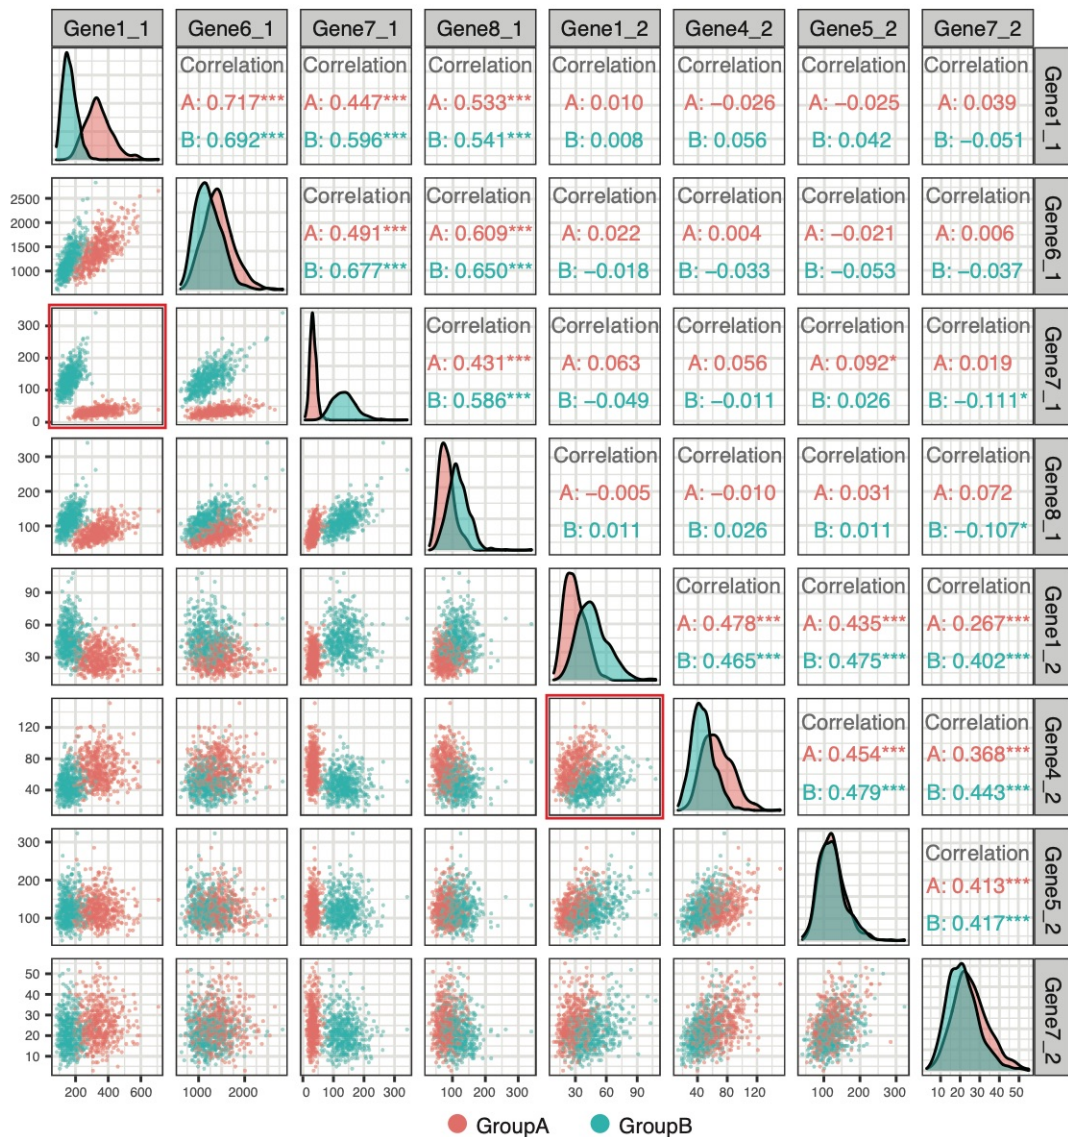

**b**

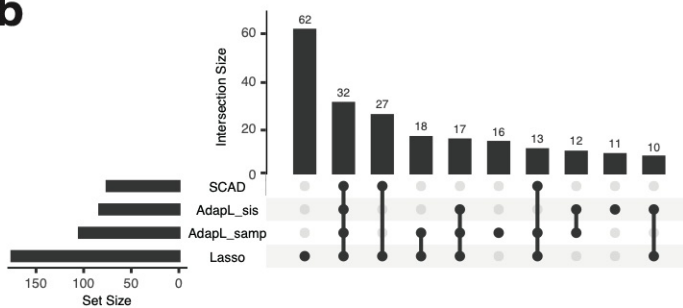

**c**

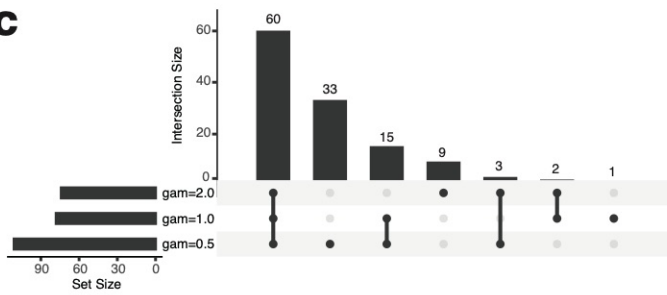

**d**

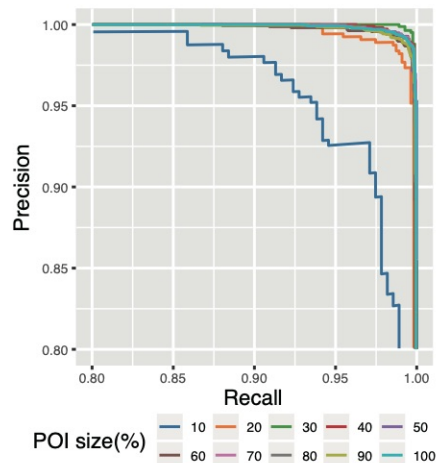

Supplement: pcbi.1009579.s001.pdf [file pcbi.1009579.s001.pdf]
