# Supplementary material for: Discriminative feature of cells characterizes cell populations of interest by a small subset of genes
Source: PubMed Central journal article supplement (PMC8641884; doi:10.1371/journal.pcbi.1009579), 2021-11-19
Supplement: pcbi.1009579.s002.pdf [file pcbi.1009579.s002.pdf]

# Figure S2\_Fujii

**a**

Day 0

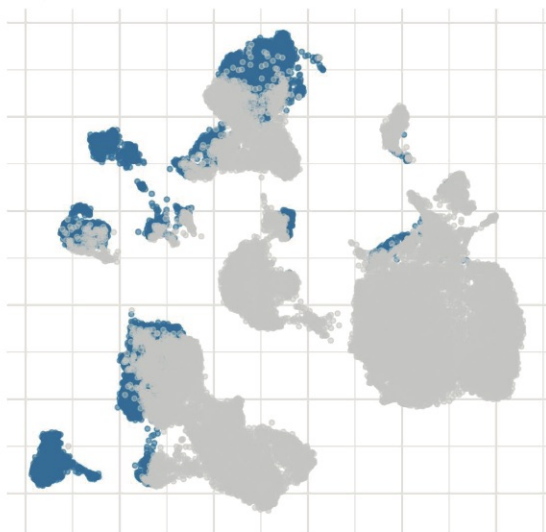

Day 2

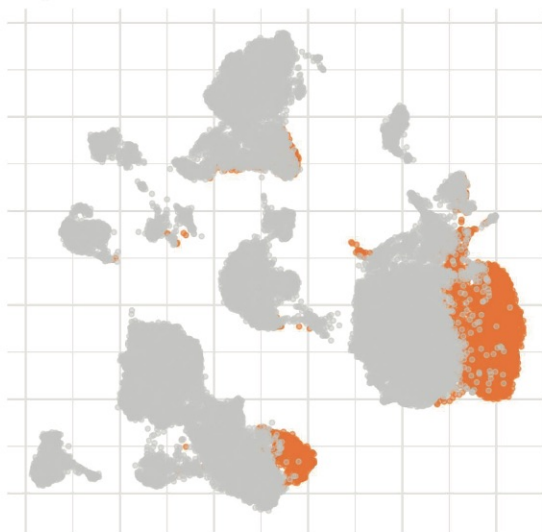

Day 5

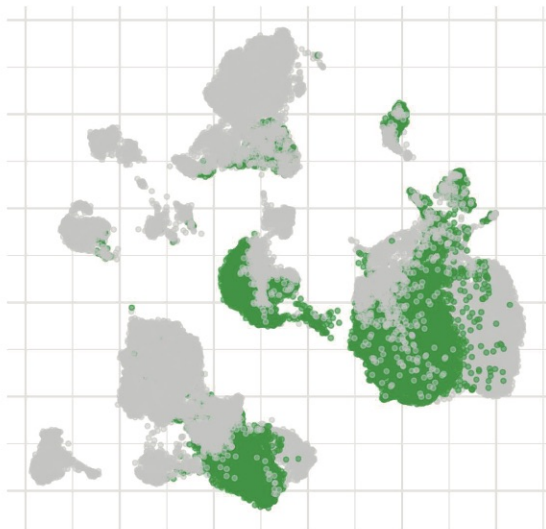

Day 7

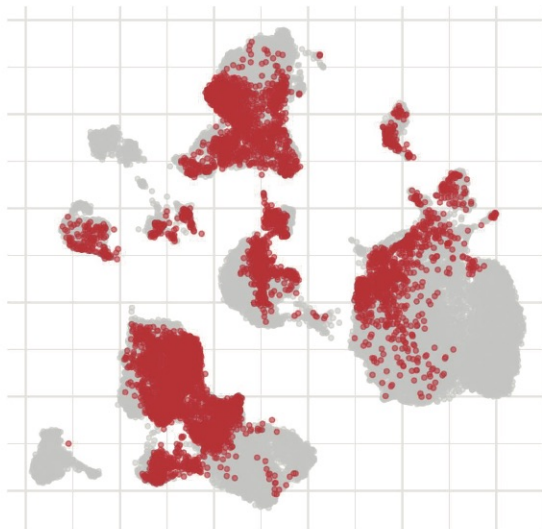

**b**

Cell annotation

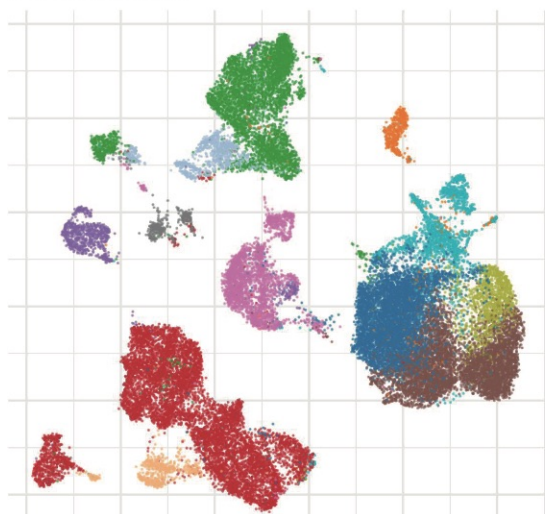

Cell annotation

- Anti-inflammatory macrophages
- B/T/NK cells
- Endothelial
- FAPs
- Mature skeletal muscle
- Monocytes/Macrophages/Platelets
- MuSCs and progenitors
- Neural/Glial/Schwann cells
- Pro-inflammatory macrophages
- Resident Macrophages/APCs
- Smooth muscle cells
- Tenocytes
