# Supplementary material for: Discriminative feature of cells characterizes cell populations of interest by a small subset of genes
Source: PubMed Central journal article supplement (PMC8641884; doi:10.1371/journal.pcbi.1009579), 2021-11-19

# Figure S3\_Fujii

**a**

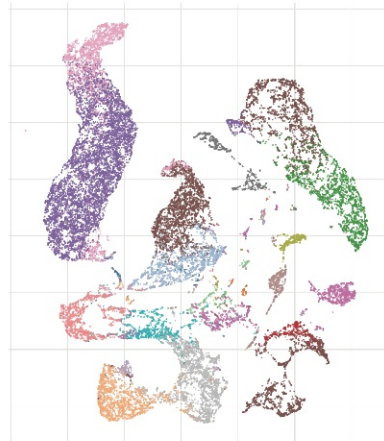

cell\_ontology\_class

- NK cell
- basophil
- erythroblast
- erythroid progenitor
- granulocyte
- granulocytopoietic cell
- hematopoietic precursor cell
- immature B cell
- late pro-B cell
- macrophage
- megakaryocyte-erythroid progenitor cell
- monocyte
- naive B cell
- naive T cell
- plasma cell
- precursor B cell
- proerythroblast
- promonocyte

**b**

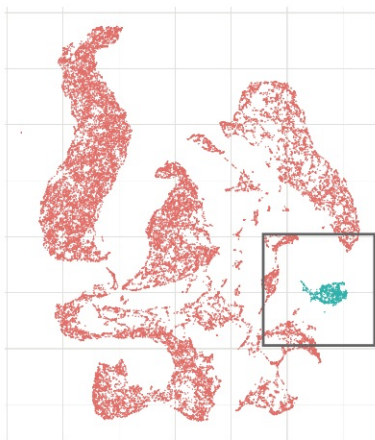

POI Other

**c**

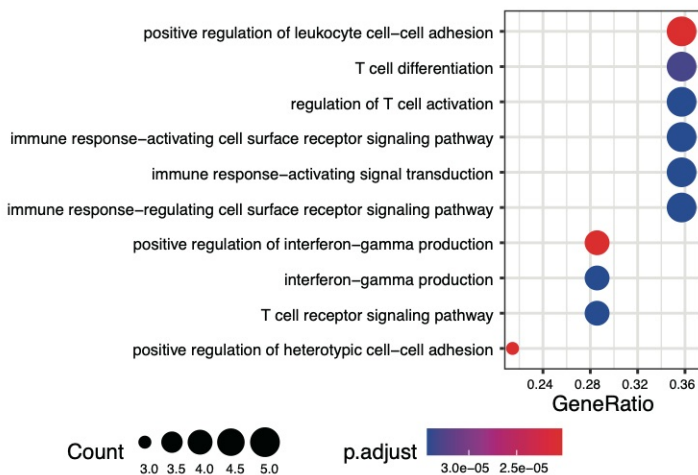

**d**

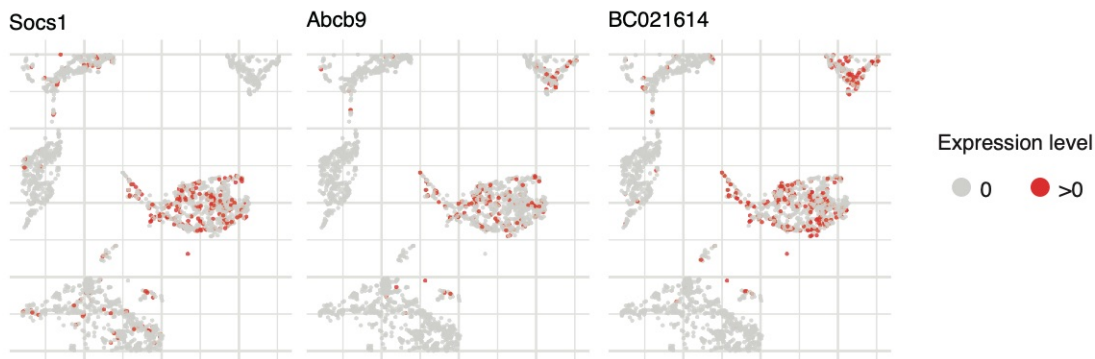

Supplement: pcbi.1009579.s003.pdf [file pcbi.1009579.s003.pdf]
