# Supplementary material for: Discriminative feature of cells characterizes cell populations of interest by a small subset of genes
Source: PubMed Central journal article supplement (PMC8641884; doi:10.1371/journal.pcbi.1009579), 2021-11-19

# Figure S4\_Fujii

## a

### Strong feature

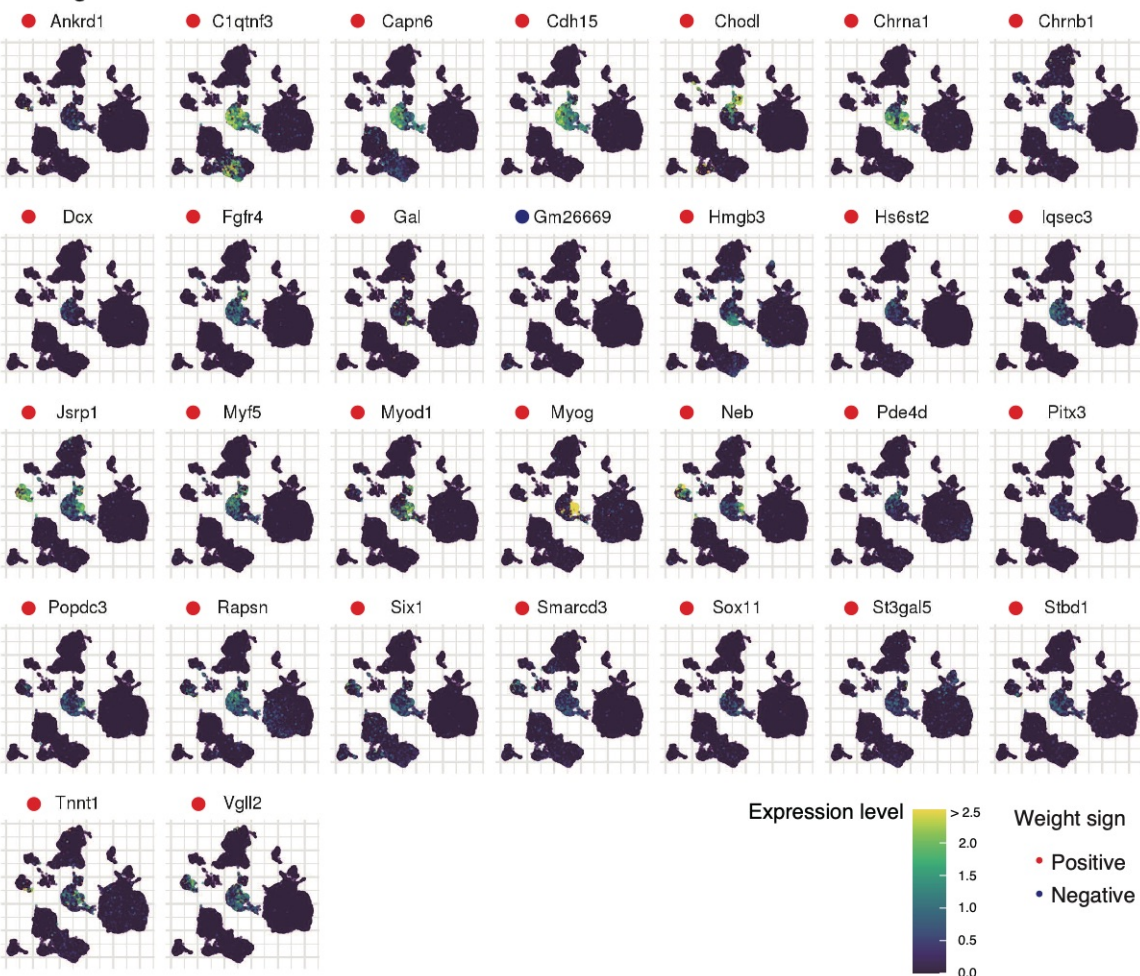

## b

### Niche feature

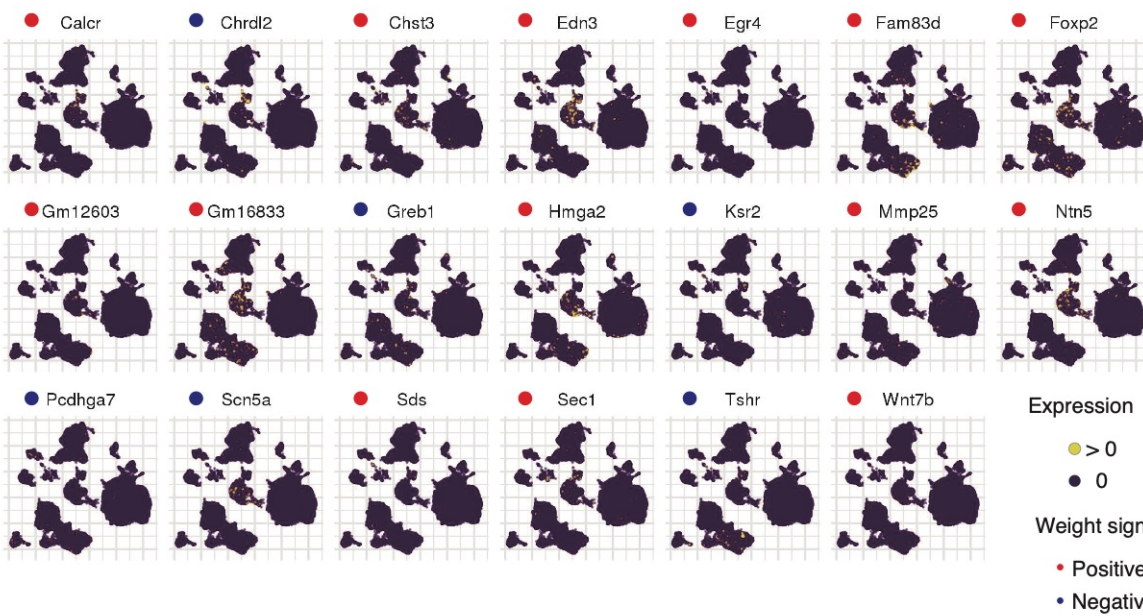

Supplement: pcbi.1009579.s004.pdf [file pcbi.1009579.s004.pdf]
