# Supplementary material for: Discriminative feature of cells characterizes cell populations of interest by a small subset of genes
Source: PubMed Central journal article supplement (PMC8641884; doi:10.1371/journal.pcbi.1009579), 2021-11-19
Supplement: pcbi.1009579.s005.pdf [file pcbi.1009579.s005.pdf]

# Figure S5\_Fujii

## Weak feature

● 201011101Rik

● Acta2

● Arpc1b

● Calm1

● Ccnd2

● Cd63

● Cd82

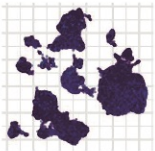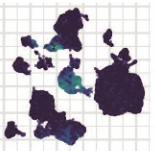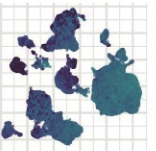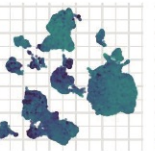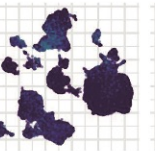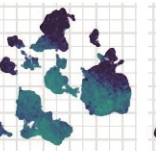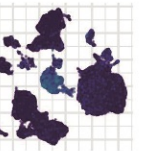

● Col1a1

● Col6a2

● Cox4i1

● Crip2

● Cst3

● Cxcl12

● Dag1

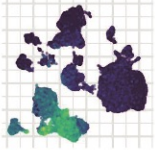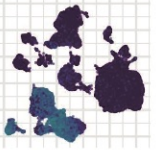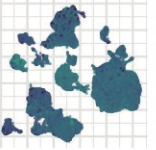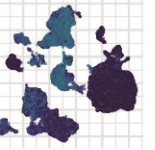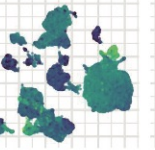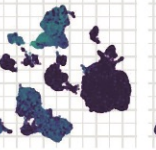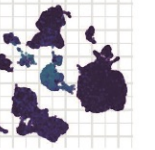

● Des

● Eif4a1

● Erdr1

● Fbln2

● Gm8730

● Gnai2

● Hmg2

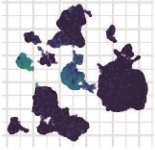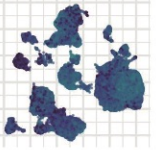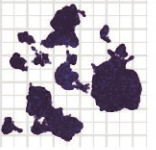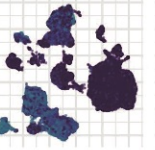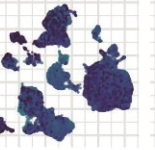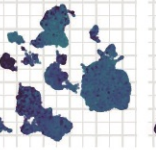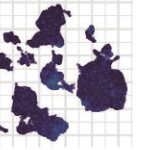

● Hsp90ab1

● Il1tm2

● Igfbp7

● Maff

● Mest

● Mfap5

● mt-Co1

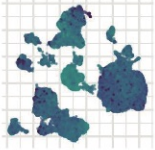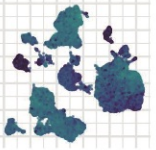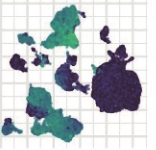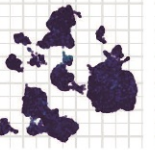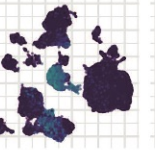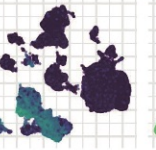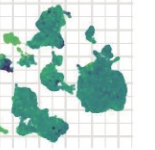

● Myl12a

● Myl6

● Oaf

● Pebp1

● Ppia

● Ppp1r14b

● Rpl10-ps3

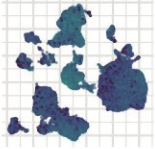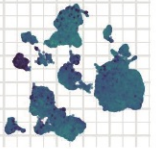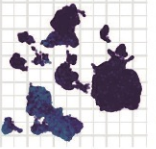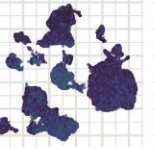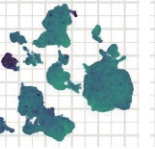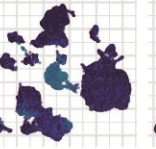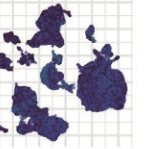

● Rpl14

● Rpl18a

● Rpl21

● Rpl22l1

● Rpl23a-ps3

● Rpl29

● Rpl31

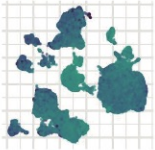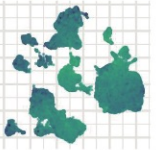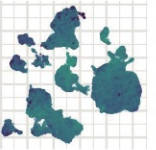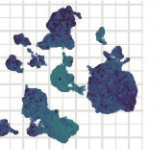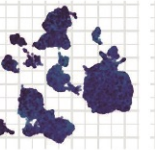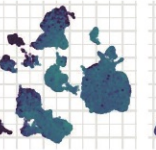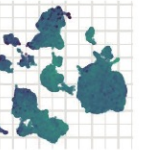

● Rpl34

● Rpl35

● Rpl37

● Rpl41

● Rps17

● Rps18

● Rps19

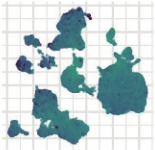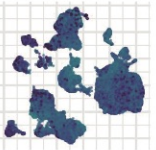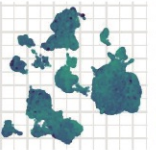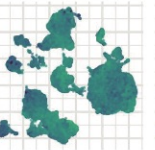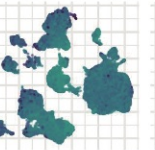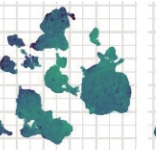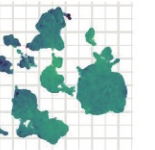

● Rps23

● Rps5

● Rps7

● Sdc4

● Sepw1

● Serf2

● Tceb1

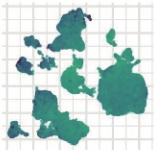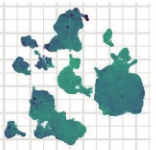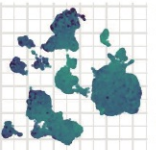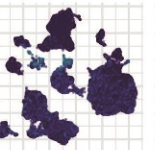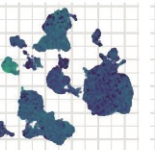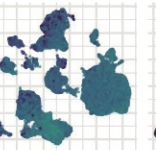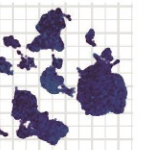

● Thy1

● Tnfrsf12a

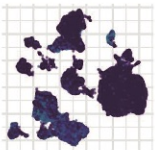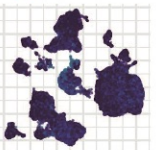

Expression level

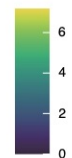

Weight sign

- Positive
- Negative
