# Supplementary material for: Discriminative feature of cells characterizes cell populations of interest by a small subset of genes
Source: PubMed Central journal article supplement (PMC8641884; doi:10.1371/journal.pcbi.1009579), 2021-11-19
Supplement: pcbi.1009579.s007.pdf [file pcbi.1009579.s007.pdf]

# Figure S7\_Fujii

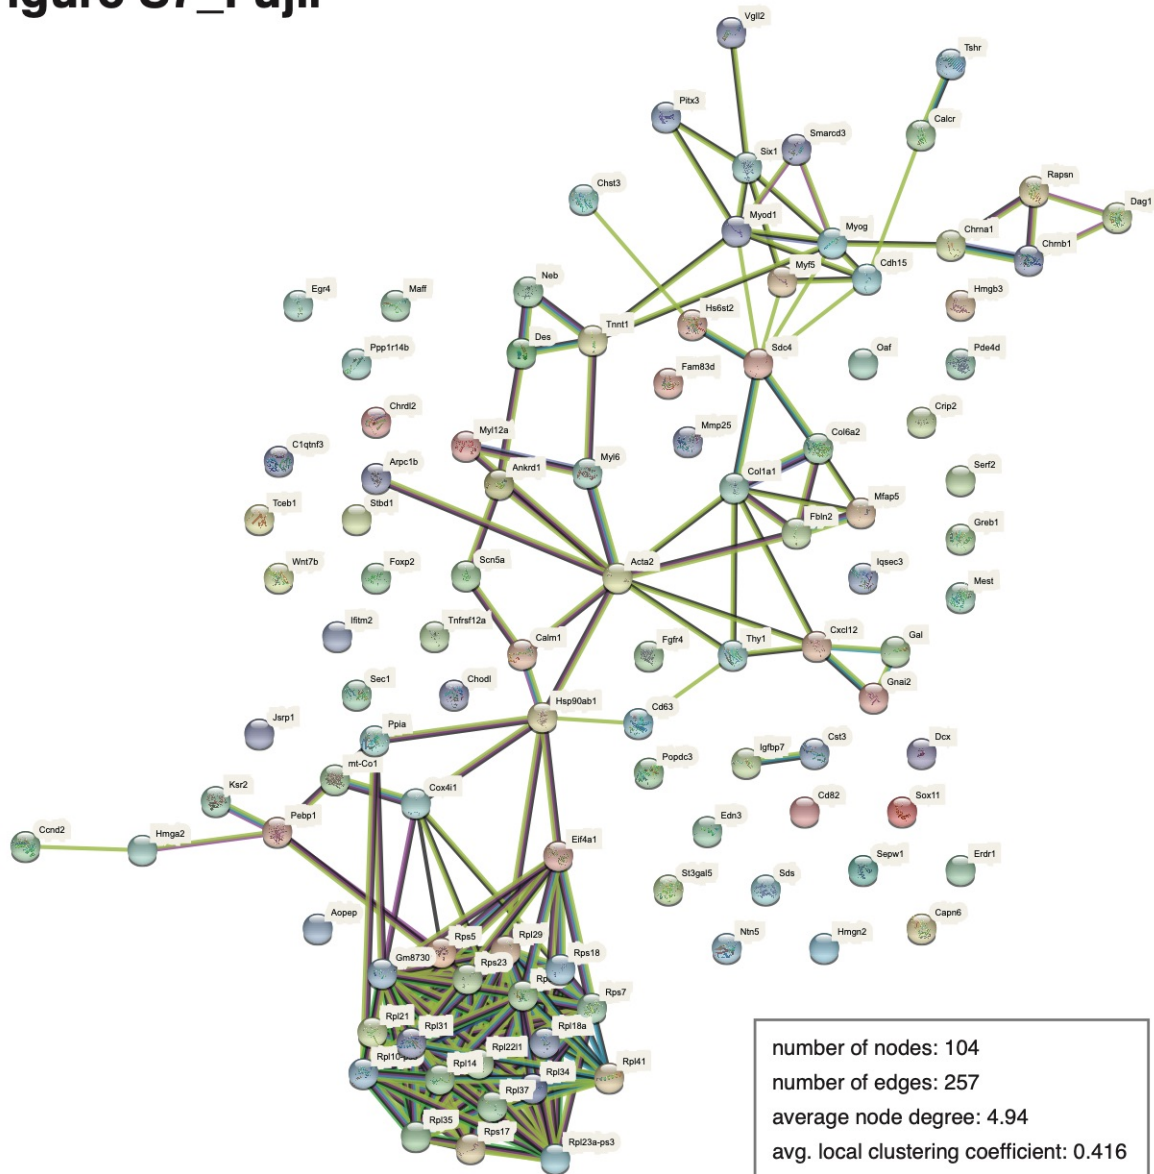

## Known Interactions

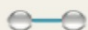

*from curated databases*

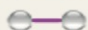

*experimentally determined*

## Predicted Interactions

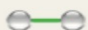

*gene neighborhood*

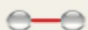

*gene fusions*

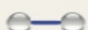

*gene co-occurrence*

## Others

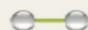

*textmining*

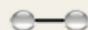

*co-expression*

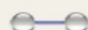

*protein homology*
