# Supplementary material for: Discriminative feature of cells characterizes cell populations of interest by a small subset of genes
Source: PubMed Central journal article supplement (PMC8641884; doi:10.1371/journal.pcbi.1009579), 2021-11-19
Supplement: pcbi.1009579.s008.pdf [file pcbi.1009579.s008.pdf]

# Figure S8\_Fujii

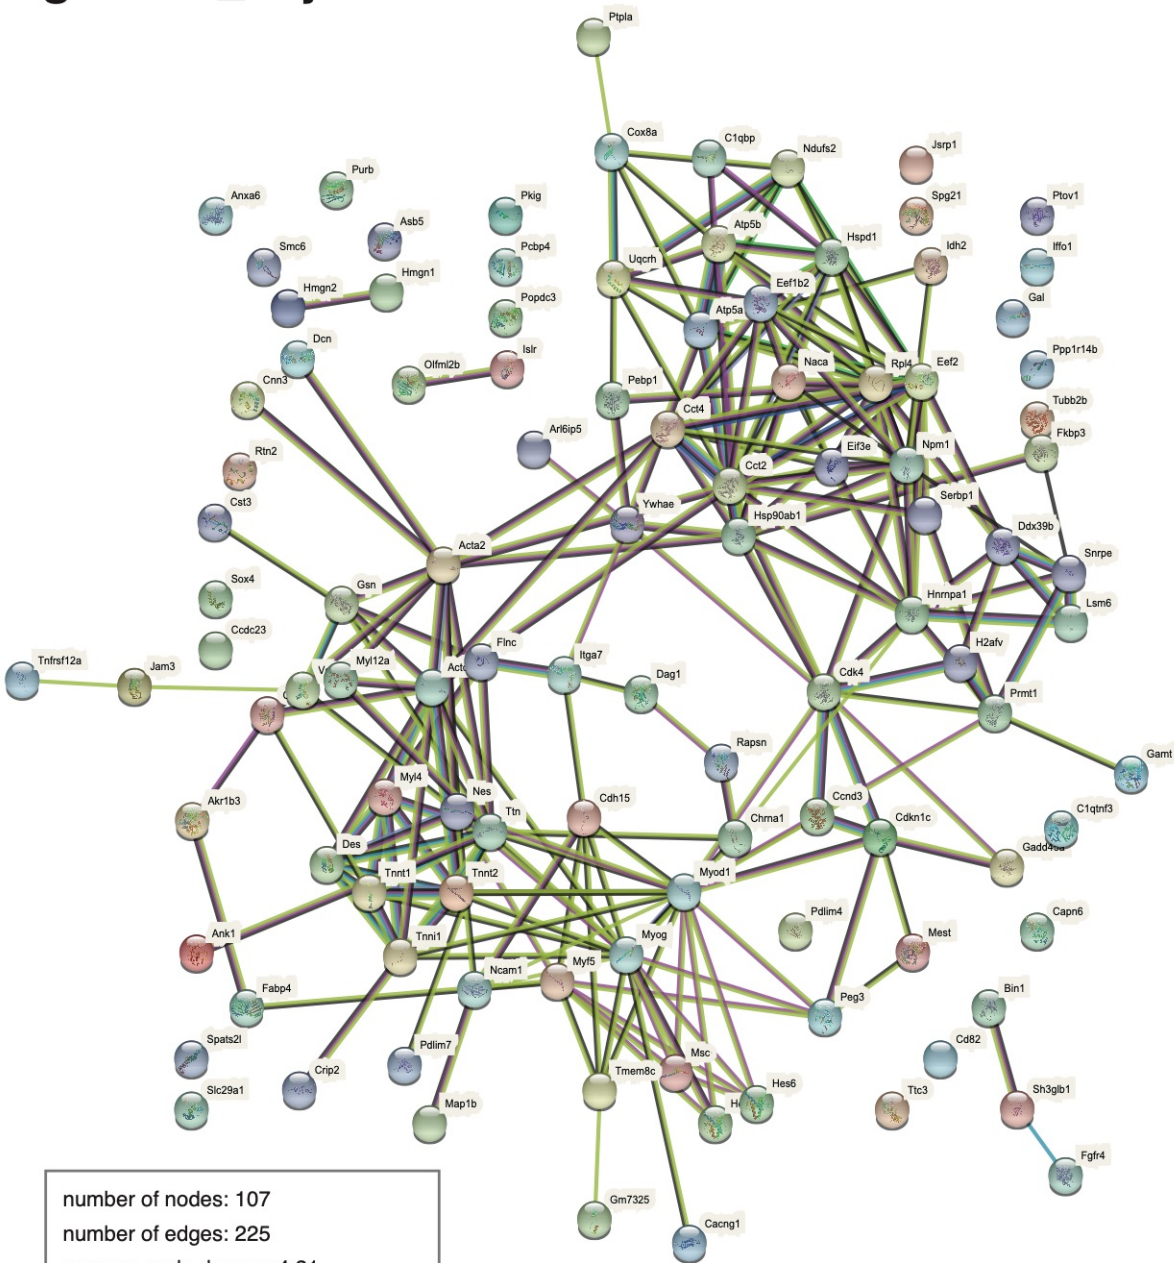

number of nodes: 107  
number of edges: 225  
average node degree: 4.21  
avg. local clustering coefficient: 0.423  
expected number of edges: 80  
PPI enrichment p-value:  $< 1.0e-16$

## Known Interactions

- from curated databases
- experimentally determined

## Predicted Interactions

- gene neighborhood
- gene fusions
- gene co-occurrence

## Others

- textmining
- co-expression
- protein homology
