# Supplementary material for: Discriminative feature of cells characterizes cell populations of interest by a small subset of genes
Source: PubMed Central journal article supplement (PMC8641884; doi:10.1371/journal.pcbi.1009579), 2021-11-19

# Figure S9\_Fujii

**a**

Ribosomal proteins in DFC (All clusters)

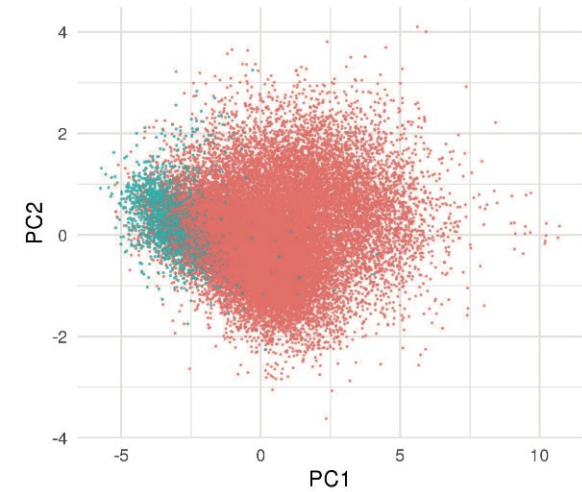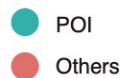

**b**

All ribosomal proteins (All clusters)

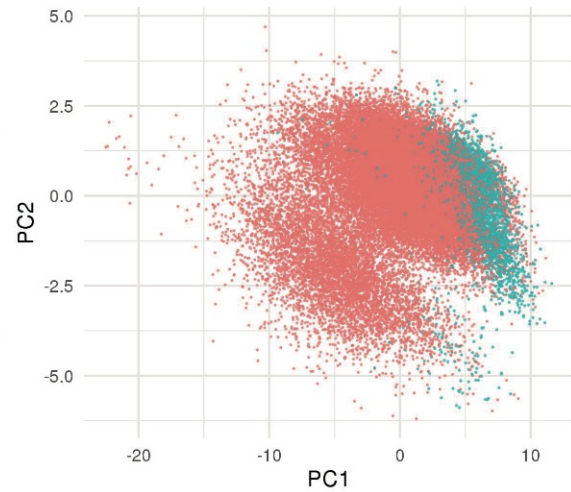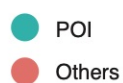

**c**

Ribosomal proteins in DFC (POI)

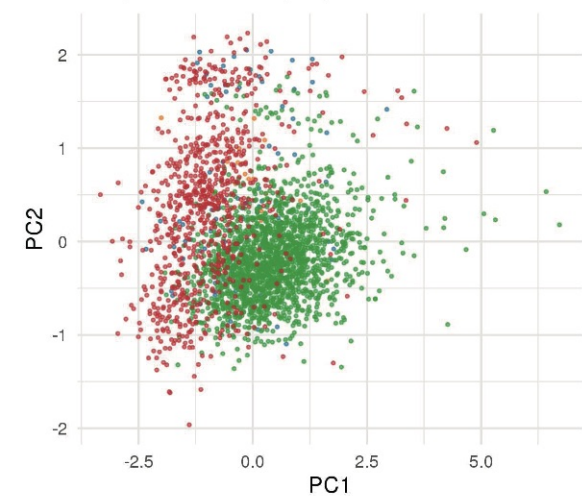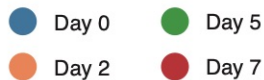

**d**

All ribosomal proteins (POI)

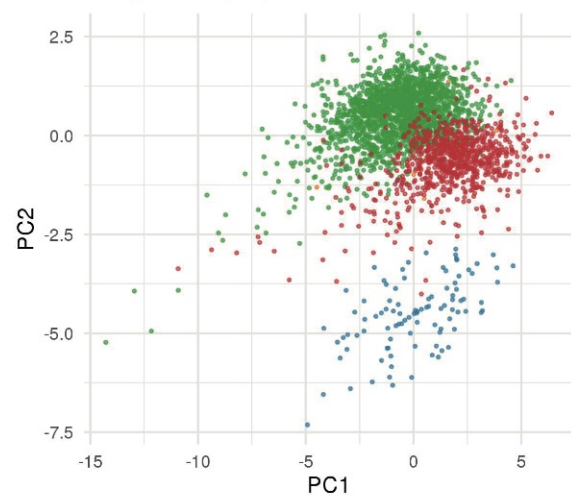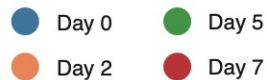

Supplement: pcbi.1009579.s009.pdf [file pcbi.1009579.s009.pdf]
